# Supplementary material for: Transcriptional heterogeneity of fibroblasts is a hallmark of the aging heart
Source: JCI journal article supplement (doi:10.1172/jci.insight.131092), 2019-11-13
Supplement: sd1 [file 1]

You are being redirected.
